# Supplementary material for: Stress Response in Toxic Diatoms: The Effects of Abiotic Factors on Growth and RNA Content in Pseudo-nitzschia calliantha and in Pseudo-nitzschia multistriata
Source: MDPI journal article supplement (doi:10.3390/jmse11091743), 2023-09-05
Supplement: s1 [file s1]

**Supplementary Table S1.** Two-Way ANOVA tests without replication related to *P. calliantha* cell concentration experiments.

| IRRADIANCE          |          |           |          |          |         |        |
|---------------------|----------|-----------|----------|----------|---------|--------|
| SUMMARY             | Counts   | Sum       | Average  | Variance |         |        |
| time1               | 3        | 15000     | 5000     | 0        |         |        |
| time2               | 3        | 91234,67  | 30411,56 | 7,38E+07 |         |        |
| time3               | 3        | 167525,67 | 55841,89 | 6,11E+08 |         |        |
| time4               | 3        | 274882    | 91627,33 | 1,12E+09 |         |        |
| Control             | 4        | 207245    | 51811,25 | 2,77E+09 |         |        |
| High                | 4        | 217295,67 | 54323,92 | 1,57E+09 |         |        |
| Low                 | 4        | 124101,67 | 31025,42 | 5,32E+08 |         |        |
| ANOVA               |          |           |          |          |         |        |
| Source of variation | SS       | gdl       | MS       | F        | P-value | F crit |
| Rows                | 1,23E+10 | 3         | 4,10E+09 | 10,69    | 0,01    | 4,76   |
| Columns             | 1,31E+09 | 2         | 6,54E+08 | 1,70     | 0,26    | 5,14   |
| Error               | 2,30E+09 | 6         | 3,84E+08 |          |         |        |
| Total               | 1,59E+10 | 11        |          |          |         |        |

| TEMPERATURE         |          |           |          |          |          |        |
|---------------------|----------|-----------|----------|----------|----------|--------|
| SUMMARY             | Counts   | Sum       | Average  | Variance |          |        |
| time1               | 3        | 15000     | 5000     | 0        |          |        |
| time2               | 3        | 74345     | 24781,67 | 4,99E+07 |          |        |
| time3               | 3        | 159121    | 53040,33 | 3,55E+08 |          |        |
| time4               | 3        | 267410,33 | 89136,78 | 8,16E+08 |          |        |
| Control             | 4        | 189813    | 47453,25 | 2,20E+09 |          |        |
| High                | 4        | 209118    | 52279,5  | 1,76E+09 |          |        |
| Low                 | 4        | 116945,33 | 29236,33 | 4,70E+08 |          |        |
| ANOVA               |          |           |          |          |          |        |
| Source of variation | SS       | gdl       | MS       | F        | P-value  | F crit |
| Rows                | 1,20E+10 | 3         | 4,01E+09 | 19,08    | 1,80E-03 | 4,76   |
| Columns             | 1,18E+09 | 2         | 5,91E+08 | 2,81     | 0,14     | 5,14   |
| Error               | 1,26E+09 | 6         | 2,10E+08 |          |          |        |
| Total               | 1,45E+10 | 11        |          |          |          |        |

| SALINITY            |          |          |          |          |         |        |
|---------------------|----------|----------|----------|----------|---------|--------|
| SUMMARY             | Counts   | Sum      | Average  | Variance |         |        |
| time1               | 3        | 6000     | 2000     | 0        |         |        |
| time2               | 3        | 30998,33 | 10332,78 | 1,98E+07 |         |        |
| time3               | 3        | 51930,33 | 17310,11 | 2,80E+07 |         |        |
| time4               | 3        | 100208   | 33402,67 | 5,23E+08 |         |        |
| Control             | 4        | 100430   | 25107,5  | 6,06E+08 |         |        |
| High                | 4        | 40992,33 | 10248,08 | 4,49E+07 |         |        |
| Low                 | 4        | 47714,33 | 11928,58 | 8,55E+07 |         |        |
| ANOVA               |          |          |          |          |         |        |
| Source of variation | SS       | gdl      | MS       | F        | P-value | F crit |
| Rows                | 1,60E+09 | 3        | 5,32E+08 | 5,22     | 0,04    | 4,76   |
| Columns             | 5,30E+08 | 2        | 2,65E+08 | 2,60     | 0,15    | 5,14   |
| Error               | 6,12E+08 | 6        | 1,02E+08 |          |         |        |
| Total               | 2,74E+09 | 11       |          |          |         |        |

| NUTRIENT DEPLETION  |          |           |          |          |          |        |
|---------------------|----------|-----------|----------|----------|----------|--------|
| SUMMARY             | Counts   | Sum       | Average  | Variance |          |        |
| time1               | 4        | 20000     | 5000     | 0        |          |        |
| time2               | 4        | 79882     | 19970,5  | 1,36E+06 |          |        |
| time3               | 4        | 148783,33 | 37195,83 | 7,19E+07 |          |        |
| time4               | 4        | 318663    | 79665,75 | 1,15E+09 |          |        |
| Control             | 4        | 145863    | 36465,75 | 1,08E+09 |          |        |
| Nitrogen            | 4        | 165130    | 41282,5  | 1,89E+09 |          |        |
| Phosphorus          | 4        | 174671,33 | 43667,83 | 1,86E+09 |          |        |
| Silica              | 4        | 81664     | 20416    | 1,34E+08 |          |        |
| ANOVA               |          |           |          |          |          |        |
| Source of variation | SS       | gdl       | MS       | F        | P-value  | F crit |
| Rows                | 1,25E+10 | 3         | 4,17E+09 | 15,88    | 6,13E-04 | 3,86   |
| Columns             | 1,31E+09 | 3         | 4,38E+08 | 1,67     | 0,24     | 3,86   |
| Error               | 2,36E+09 | 9         | 2,62E+08 |          |          |        |
| Total               | 1,62E+10 | 15        |          |          |          |        |

**Supplementary Table S2.** Two-Way ANOVA tests without replication related to *P. multistriata* cell concentration experiments.

| IRRADIANCE          |          |           |           |          |         |        |
|---------------------|----------|-----------|-----------|----------|---------|--------|
| SUMMARY             | Counts   | Sum       | Average   | Variance |         |        |
| time1               | 3        | 15000     | 5000      | 0        |         |        |
| time2               | 3        | 95411,67  | 31803,89  | 3,36E+08 |         |        |
| time3               | 3        | 352217,67 | 117405,89 | 5,66E+09 |         |        |
| time4               | 3        | 491356    | 163785,33 | 1,30E+10 |         |        |
| Control             | 4        | 548565,67 | 137141,42 | 1,81E+10 |         |        |
| High                | 4        | 245815,67 | 61453,92  | 2,42E+09 |         |        |
| Low                 | 4        | 159604    | 39901     | 1,53E+09 |         |        |
| ANOVA               |          |           |           |          |         |        |
| Source of variation | SS       | gdl       | MS        | F        | P-value | F crit |
| Rows                | 4,91E+10 | 3         | 1,64E+10  | 5,71     | 0,03    | 4,76   |
| Columns             | 2,09E+10 | 2         | 1,04E+10  | 3,64     | 0,09    | 5,14   |
| Error               | 1,72E+10 | 6         | 2,86E+09  |          |         |        |
| Total               | 8,71E+10 | 11        |           |          |         |        |

| TEMPERATURE         |          |           |           |          |          |        |
|---------------------|----------|-----------|-----------|----------|----------|--------|
| SUMMARY             | Counts   | Sum       | Average   | Variance |          |        |
| time1               | 3        | 15000     | 5000      | 0        |          |        |
| time2               | 3        | 51175,67  | 17058,56  | 5,39E+07 |          |        |
| time3               | 3        | 264397,67 | 88132,56  | 1,94E+09 |          |        |
| time4               | 3        | 362258,67 | 120752,89 | 2,03E+09 |          |        |
| Control             | 4        | 275281,67 | 68820,42  | 4,94E+09 |          |        |
| High                | 4        | 294872,67 | 73718,17  | 4,76E+09 |          |        |
| Low                 | 4        | 122677,67 | 30669,42  | 8,44E+08 |          |        |
| ANOVA               |          |           |           |          |          |        |
| Source of variation | SS       | gdl       | MS        | F        | P-value  | F crit |
| Rows                | 2,80E+10 | 3         | 9,33E+09  | 15,48    | 3,13E-03 | 4,76   |
| Columns             | 4,44E+09 | 2         | 2,22E+09  | 3,69     | 0,09     | 5,14   |
| Error               | 3,62E+09 | 6         | 6,03E+08  |          |          |        |
| Total               | 3,61E+10 | 11        |           |          |          |        |

| SALINITY            |          |          |          |           |         |        |
|---------------------|----------|----------|----------|-----------|---------|--------|
| SUMMARY             | Counts   | Sum      | Average  | Variance  |         |        |
| time1               | 3        | 6000     | 2000     | 0         |         |        |
| time2               | 3        | 9527,33  | 3175,78  | 848016,7  |         |        |
| time3               | 3        | 14617,33 | 4872,44  | 1,46E+07  |         |        |
| time4               | 3        | 75310,67 | 25103,56 | 1,40E+09  |         |        |
| Control             | 4        | 82304    | 20576    | 1,01E+09  |         |        |
| High                | 4        | 16649,67 | 4162,42  | 2,92E+06  |         |        |
| Low                 | 4        | 6501,67  | 1625,42  | 383990,25 |         |        |
| ANOVA               |          |          |          |           |         |        |
| Source of variation | SS       | gdl      | MS       | F         | P-value | F crit |
| Rows                | 1,08E+09 | 3        | 3,59E+08 | 1,09      | 0,42    | 4,76   |
| Columns             | 8,47E+08 | 2        | 4,23E+08 | 1,28      | 0,34    | 5,14   |
| Error               | 1,98E+09 | 6        | 3,30E+08 |           |         |        |
| Total               | 3,90E+09 | 11       |          |           |         |        |

| NUTRIENT DEPLETION  |          |          |          |          |          |        |
|---------------------|----------|----------|----------|----------|----------|--------|
| SUMMARY             | Counts   | Sum      | Average  | Variance |          |        |
| time1               | 4        | 20000    | 5000     | 0        |          |        |
| time2               | 4        | 37197    | 9299,25  | 95757,14 |          |        |
| time3               | 4        | 55013,67 | 13753,42 | 7,62E+06 |          |        |
| time4               | 4        | 50249,67 | 12562,42 | 6,97E+06 |          |        |
| Control             | 4        | 47614,67 | 11903,67 | 3,38E+07 |          |        |
| Nitrogen            | 4        | 38412,33 | 9603,08  | 1,24E+07 |          |        |
| Phosphorus          | 4        | 41316,33 | 10329,08 | 1,63E+07 |          |        |
| Silica              | 4        | 35117    | 8779,25  | 6,52E+06 |          |        |
| ANOVA               |          |          |          |          |          |        |
| Source of variation | SS       | gdl      | MS       | F        | P-value  | F crit |
| Rows                | 1,84E+08 | 3        | 6,14E+07 | 24,11    | 1,23E-04 | 3,86   |
| Columns             | 2,11E+07 | 3        | 7,05E+06 | 2,77     | 0,10     | 3,86   |
| Error               | 2,29E+07 | 9        | 2,55E+06 |          |          |        |
| Total               | 2,28E+08 | 15       |          |          |          |        |

**Supplementary Table S3.** Fluorescence values expressed as relative fluorescence intensity in arbitrary units (AU) related to the irradiance stress experiments. Measurement times are 0, 24, 48 and 72 hours (T0, T1, T2 and T3, respectively) for both *P. calliantha* and *P. multistriata* species (Pc and Pm, respectively). Standard deviations for each fluorescence value are also shown.

|      | Control          |                  | Low irradiance  |                  | High irradiance |                 |
|------|------------------|------------------|-----------------|------------------|-----------------|-----------------|
| Time | Pc               | Pm               | Pc              | Pm               | Pc              | Pm              |
| T0   | 146.67 ± 50.33   | 206.67 ± 83.27   | 146.67 ± 50.33  | 246.67 ± 83.27   | 146.67 ± 50.33  | 206.67 ± 83.27  |
| T1   | 393.33 ± 80.2    | 746.67 ± 655.16  | 246.67 ± 141.89 | 586.67 ± 300.89  | 220.00 ± 121.24 | 390.00 ± 147.30 |
| T2   | 766.67 ± 450.92  | 2766.67 ± 873.69 | 460.00 ± 314.32 | 1000.00 ± 500.00 | 550.00 ± 427.20 | 516.67 ± 317.54 |
| T3   | 1346.67 ± 741.98 | 4533.33 ± 642.91 | 900.00 ± 556.78 | 1600.00 ± 854.40 | 583.33 ± 292.97 | 670.00 ± 345.98 |

**Supplementary Table S4.** Fluorescence values expressed as relative fluorescence intensity in arbitrary units (AU) related to the temperature stress experiments. Measurement times are 0, 24, 48 and 72 hours (T0, T1, T2 and T3, respectively) for both *P. calliantha* and *P. multistriata* species (Pc and Pm, respectively). Standard deviations for each fluorescence value are also shown.

|      | Control          |                  | Low temperature |                  | High temperature |                   |
|------|------------------|------------------|-----------------|------------------|------------------|-------------------|
| Time | Pc               | Pm               | Pc              | Pm               | Pc               | Pm                |
| T0   | 93.33 ± 20.82    | 180.00 ± 78.10   | 93.33 ± 20.82   | 180.00 ± 78.1    | 93.33 ± 20.82    | 180.00 ± 78.1     |
| T1   | 203.33 ± 64.29   | 700.00 ± 360.56  | 153.33 ± 85.05  | 443.33 ± 191.4   | 216.67 ± 80.83   | 740.00 ± 294.62   |
| T2   | 570.00 ± 345.98  | 2133.33 ± 750.56 | 410.00 ± 343.95 | 1266.67 ± 351.19 | 1100.00 ± 264.58 | 2733.33 ± 642.91  |
| T3   | 1333.33 ± 802.08 | 3966.67 ± 503.32 | 910.00 ± 947.79 | 2366.67 ± 472.58 | 1100.00 ± 100.00 | 3066.67 ± 1504.44 |

**Supplementary Table S5.** Fluorescence values expressed as relative fluorescence intensity in arbitrary units (AU) related to the salinity stress experiments. Measurement times are 0, 24, 48 and 72 hours (T0, T1, T2 and T3, respectively) for both *P. calliantha* and *P. multistriata* species (Pc and Pm, respectively). Standard deviations for each fluorescence value are also shown.

|      | Control         |                  | Low salinity    |              | High salinity   |                 |
|------|-----------------|------------------|-----------------|--------------|-----------------|-----------------|
| Time | Pc              | Pm               | Pc              | Pm           | Pc              | Pm              |
| T0   | 50.00 ± 0.00    | 50.00 ± 0.00     | 30.00 ± 20.00   | 13.33 ± 5.77 | 31.67 ± 12.58   | 33.33 ± 5.77    |
| T1   | 116.67 ± 40.41  | 156.67 ± 56.86   | 46.67 ± 46.19   | 13.33 ± 5.77 | 56.67 ± 37.86   | 31.67 ± 12.58   |
| T2   | 263.33 ± 98.15  | 533.33 ± 152.75  | 106.67 ± 167.43 | 10.00 ± 0.00 | 90.00 ± 96.44   | 53.33 ± 58.59   |
| T3   | 826.67 ± 473.43 | 1800.00 ± 866.03 | 340.00 ± 571.58 | 10.00 ± 0.00 | 226.67 ± 240.07 | 203.33 ± 260.83 |

**Supplementary Table S6.** Fluorescence values expressed as relative fluorescence intensity in arbitrary units (AU) related to the nutrient depletion stress experiments. Measurement times are 0, 24, 48 and 72 hours (T0, T1, T2 and T3, respectively) for both *P. calliantha* and *P. multistriata* species (Pc and Pm, respectively). Standard deviations for each fluorescence value are also shown.

|      | Control          |                 | Nitrogen        |                 | Phosphorous      |                 | Silicon         |                 |
|------|------------------|-----------------|-----------------|-----------------|------------------|-----------------|-----------------|-----------------|
| Time | Pc               | Pm              | Pc              | Pm              | Pc               | Pm              | Pc              | Pm              |
| T0   | 146.67 ± 50.33   | 206.67 ± 83.27  | 146.67 ± 50.33  | 206.67 ± 83.27  | 146.67 ± 50.33   | 206.67 ± 83.27  | 146.67 ± 50.33  | 206.67 ± 83.27  |
| T1   | 190.00 ± 36.06   | 130.00 ± 36.06  | 190.00 ± 36.06  | 140.00 ± 36.06  | 186.67 ± 41.63   | 143.33 ± 45.09  | 173.33 ± 46.19  | 146.67 ± 50.33  |
| T2   | 396.67 ± 105.04  | 183.33 ± 40.41  | 403.33 ± 100.17 | 220.00 ± 80.00  | 440.00 ± 144.22  | 246.67 ± 128.97 | 330.00 ± 151.33 | 206.67 ± 102.63 |
| T3   | 1000.00 ± 360.56 | 533.33 ± 407.23 | 1033.33 ± 57.74 | 466.67 ± 305.51 | 1200.00 ± 300.00 | 546.67 ± 405.13 | 316.67 ± 90.74  | 340.00 ± 147.30 |

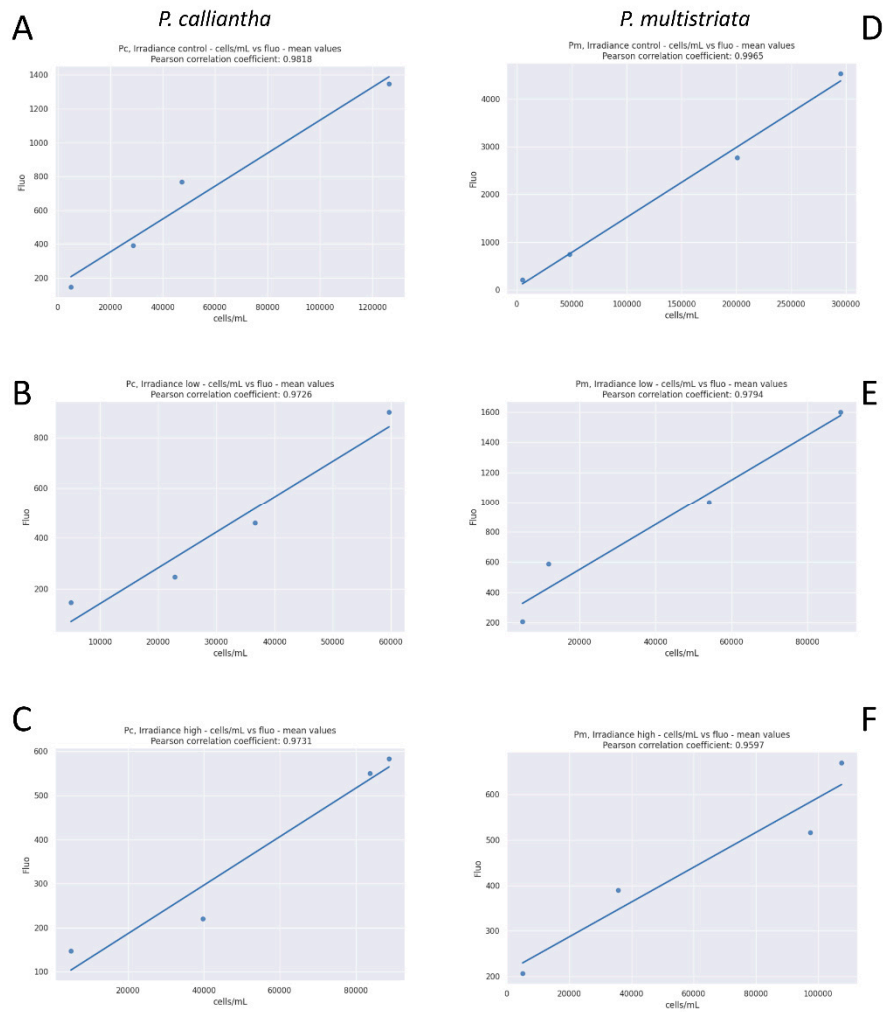

**Supplementary Figure S1.** Scatter plots and related regression lines of cells/mL versus fluorescence values in irradiance stress experiments in *P. calliantha* (A, B, C) and *P. multistriata* (D, E, F), in control (A, D), low (B, E) and high (C, F) irradiance stress condition. An irradiance of 100, 45 and 350  $\mu\text{mol m}^{-2}\text{s}^{-1}$  was applied for the control, low and high treatments, respectively.

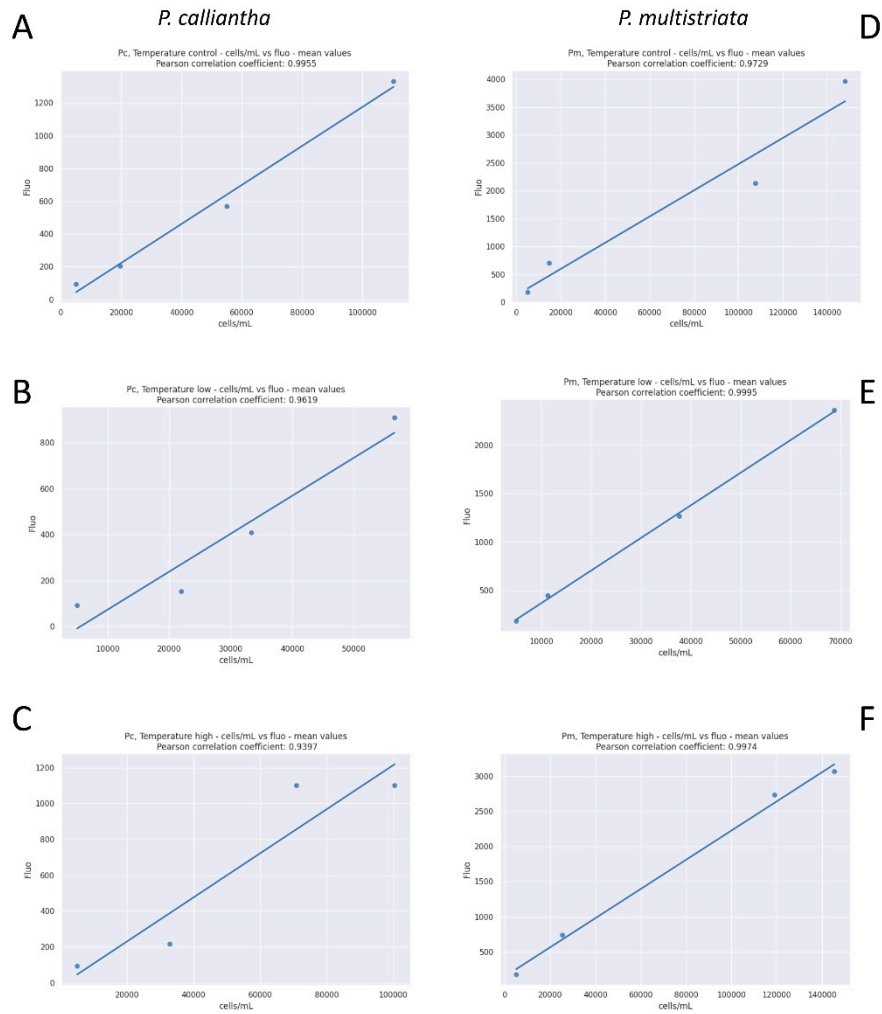

**Supplementary Figure S2.** Scatter plots and related regression lines of cells/mL versus fluorescence values in temperature stress experiments in *P. calliantha* (A, B, C) and *P. multistriata* (D, E, F), in control (A, D), low (B, E) and high (C, F) temperature stress condition. A temperature for the control, low and high treatments was setted at 20, 12 and 28 °C, respectively.

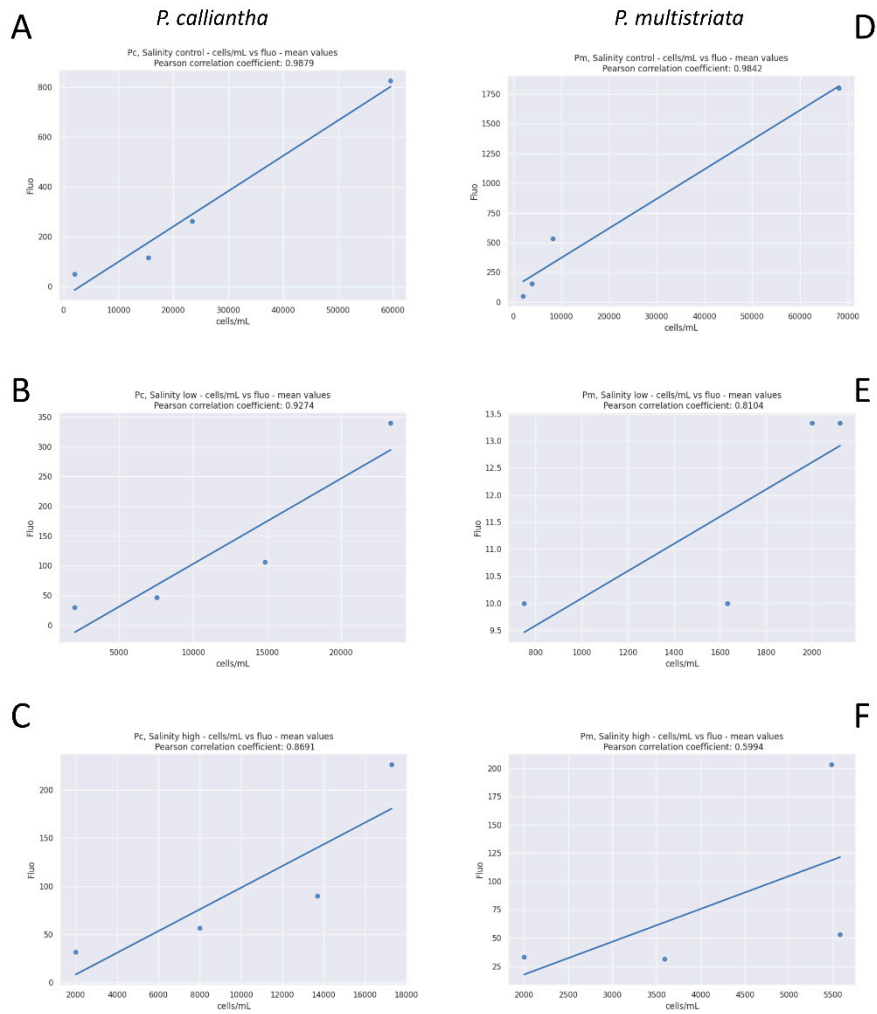

**Supplementary Figure S3.** Scatter plots and related regression lines of cells/mL versus fluorescence values in salinity stress experiments in *P. calliantha* (A, B, C) and *P. multistriata* (D, E, F), in control (A, D), low (B, E) and high (C, F) salinity stress condition. Salinity effect was evaluated by setting control, low and high salinity at 36, 34 and 38 PSU, respectively.

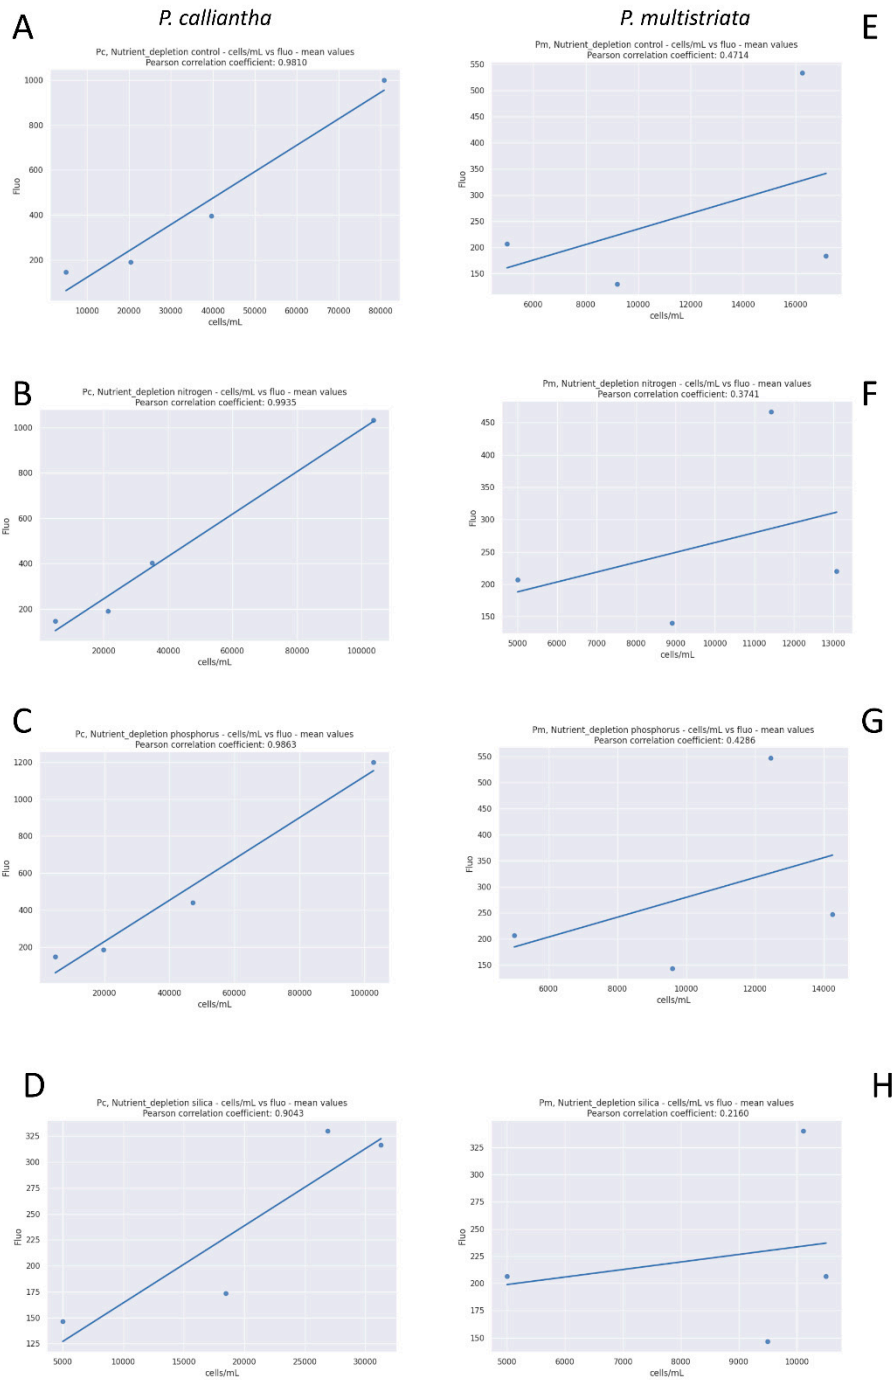

**Supplementary Figure S4.** Scatter plots and related regression lines of cells/mL versus fluorescence values in nutrient depletion stress experiments in *P. calliantha* (A, B, C, D) and *P. multistriata* (E, F, G, H), in control (A, E), nitrogen (B, F), phosphorous (C, G) and silica (D, H) depletion condition. Nutrient depletion was evaluated by using cells cultured in f/2 medium as control condition, and comparing it to those maintained in media deprived of  $\text{NaNO}_3$ ,  $\text{K}_2\text{HPO}_4$  or  $\text{Na}_2\text{SiO}_3$ .
